# Supplementary material for: Atg9 vesicles are an important membrane source during early steps of autophagosome formation
Source: PubMed Central journal article supplement — J Cell Biol. 2012 Jul 23;198(2):219–33. doi: 10.1083/jcb.201202061 (PMC3410421; doi:10.1083/jcb.201202061), 2012-07-23
Supplement: supp_jcb.201202061_JCB_201202061_sm.pdf [file supp_jcb.201202061_JCB_201202061_sm.pdf]

Yamamoto et al., <http://www.jcb.org/cgi/content/full/jcb.201202061/DC1>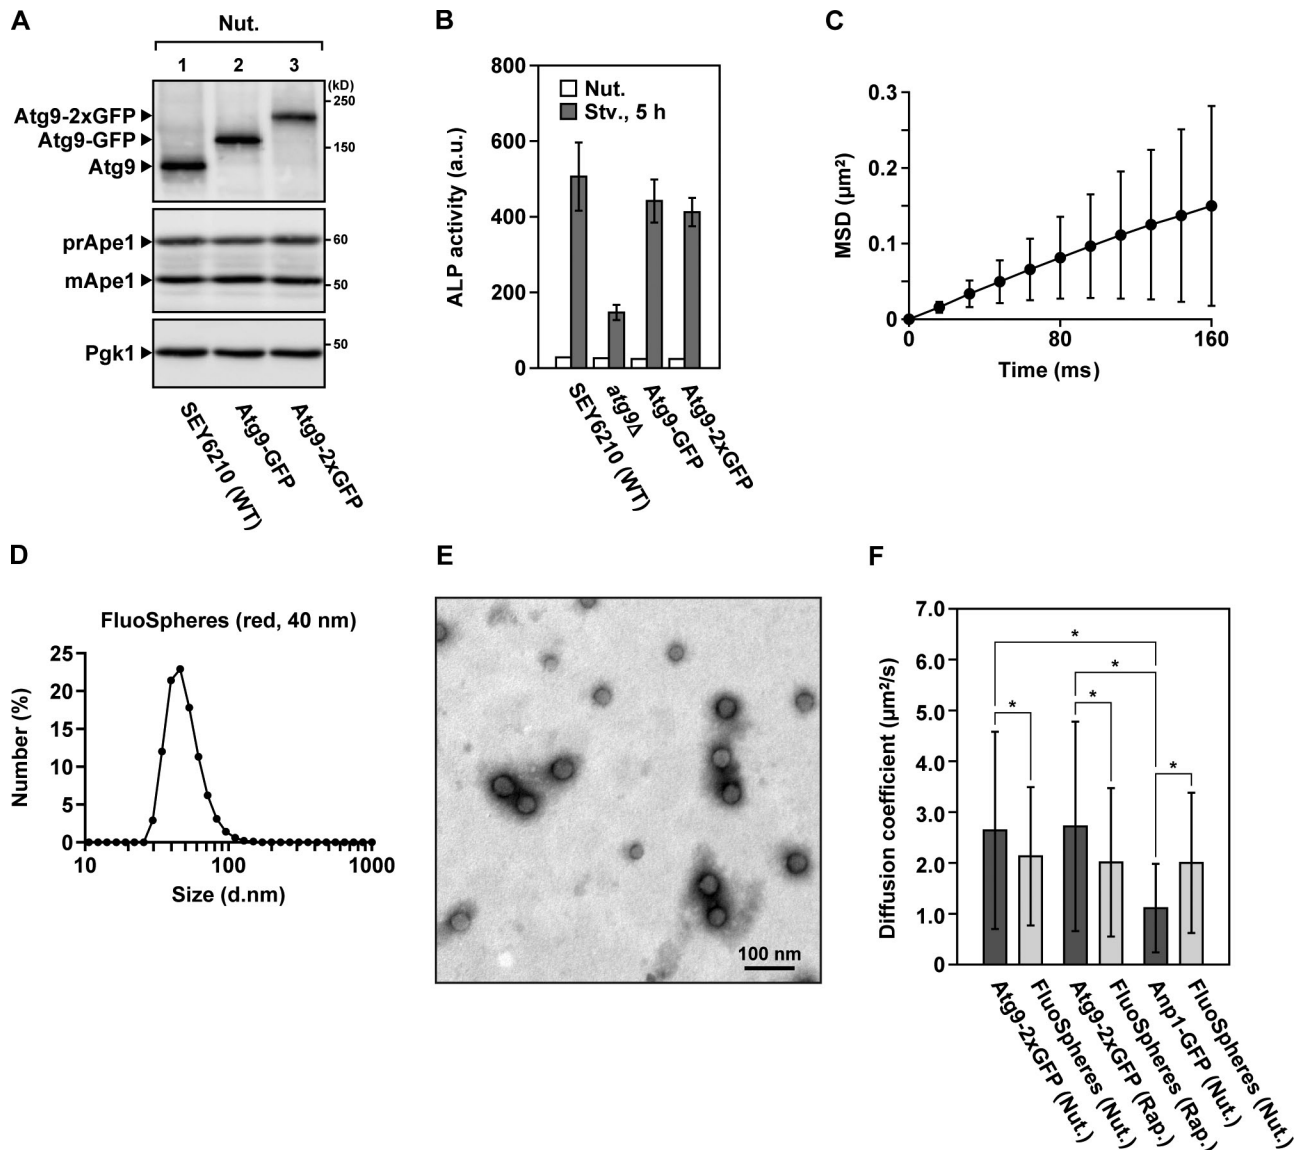

Figure S1. **Atg9-containing structures are observed by high temporal resolution microscopy and analyzed by single-particle tracking.** (A) Total cell lysates were prepared from SEY6210 wild-type cells, *ATG9-GFP* cells, and *ATG9-2xGFP* cells grown in SD/CA medium and then subjected to immunoblotting. (B) Autophagic activities of the cells used in A were measured by alkaline phosphatase (ALP) assay using pTN3 (Noda et al., 1995). Error bars indicate standard deviation. (A and B) The expression level of Atg9-GFP was comparable to that of endogenous Atg9, but that of Atg9-2xGFP was lower than that of endogenous Atg9; however, both Atg9-GFP and Atg9-2xGFP were substantially functional in terms of autophagosome formation as judged by ALP assay, and we also confirmed that the intracellular behavior of Atg9-2xGFP puncta appeared to be comparable to that of Atg9-GFP puncta (not depicted). a.u., arbitrary unit; Nut., nutrient; Stv., starved; WT, wild type. (C) Additional data associated with Fig. 1 E. Mean square displacement (MSD) curves calculated from traces of Atg9 puncta in cells starved for 2 h. Error bars indicate standard deviation. (D) Mean size of FluoSpheres used in Fig. 2 A was estimated by DLS. The mean diameter was calculated to be 44.1 nm. d.nm, diameter in nanometers. (E) FluoSpheres used in Fig. 2 A were subjected to negative staining EM. (F) Total MSD curves of the Atg9 puncta in the cells starved for 2 h calculated in Fig. 1 F were shown. Error bars indicate standard deviation. Rap., rapamycin. \*,  $P < 0.005$ .

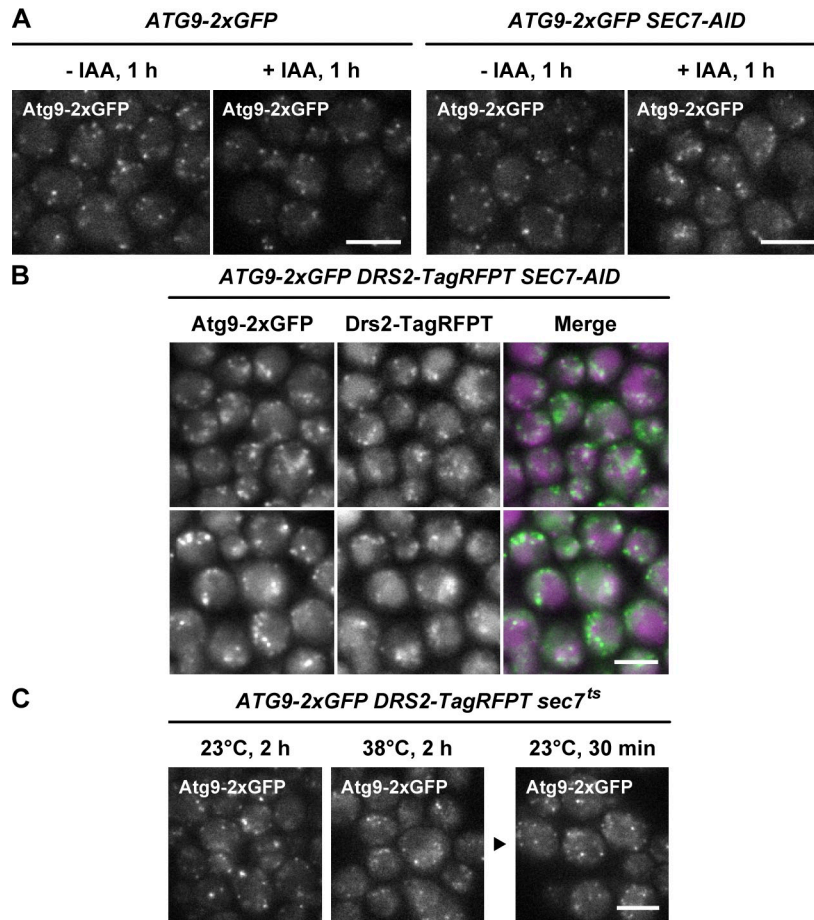

Figure S2. **Atg9 vesicles are derived from the Golgi apparatus.** (A and B) *ATG9-2xGFP DRS2-TagRFPT* cells (wild type) and *ATG9-2xGFP DRS2-TagRFPT SEC7-AID* cells were treated with rapamycin for 30 min and then treated with 500  $\mu$ g/ml indole-3-acetic acid (IAA) for 1 h. Drs2-TagRFPT was used as a trans-Golgi network marker. Green fluorescence and red fluorescence were acquired concurrently. Sec7 is an essential protein involved in protein trafficking via the Golgi apparatus (Franzoso and Schekman, 1989), prohibiting the use of an unconditional knockout; therefore, we used an auxin-inducible degron (AID; Nishimura et al., 2009) to allow conditional depletion of Sec7. Upon addition of IAA (a natural auxin), Sec7-AID was degraded in an auxin-dependent manner (not depicted). Concomitantly, a subpopulation of Atg9-2xGFP accumulated at the trans-Golgi network, here labeled with Drs2-TagRFPT (see also Video 3). (C) *ATG9-2xGFP DRS2-TagRFPT sec7<sup>ts</sup>* cells grown at 23°C were shifted to 38°C and incubated for 2 h. Next, the cells were shifted to 23°C and incubated for 30 min. At the nonpermissive temperature (38°C), Atg9-2xGFP formed immobile structures in *sec7<sup>ts</sup>* cells (Novick et al., 1980), which were colocalized with Drs2-TagRFPT (not depicted), and after returning to the permissive temperature (23°C), the accumulated Atg9-2xGFP was partially released to the cytoplasm as mobile Atg9 vesicles (see also Video 4). These results are largely consistent with previous studies (Mari et al., 2010; Ohashi and Munro, 2010) and with the hypothesis that the Atg9 vesicles were generated via the Golgi apparatus. The arrowhead indicates temperature shift from 38 to 23°C. Bars, 5  $\mu$ m.

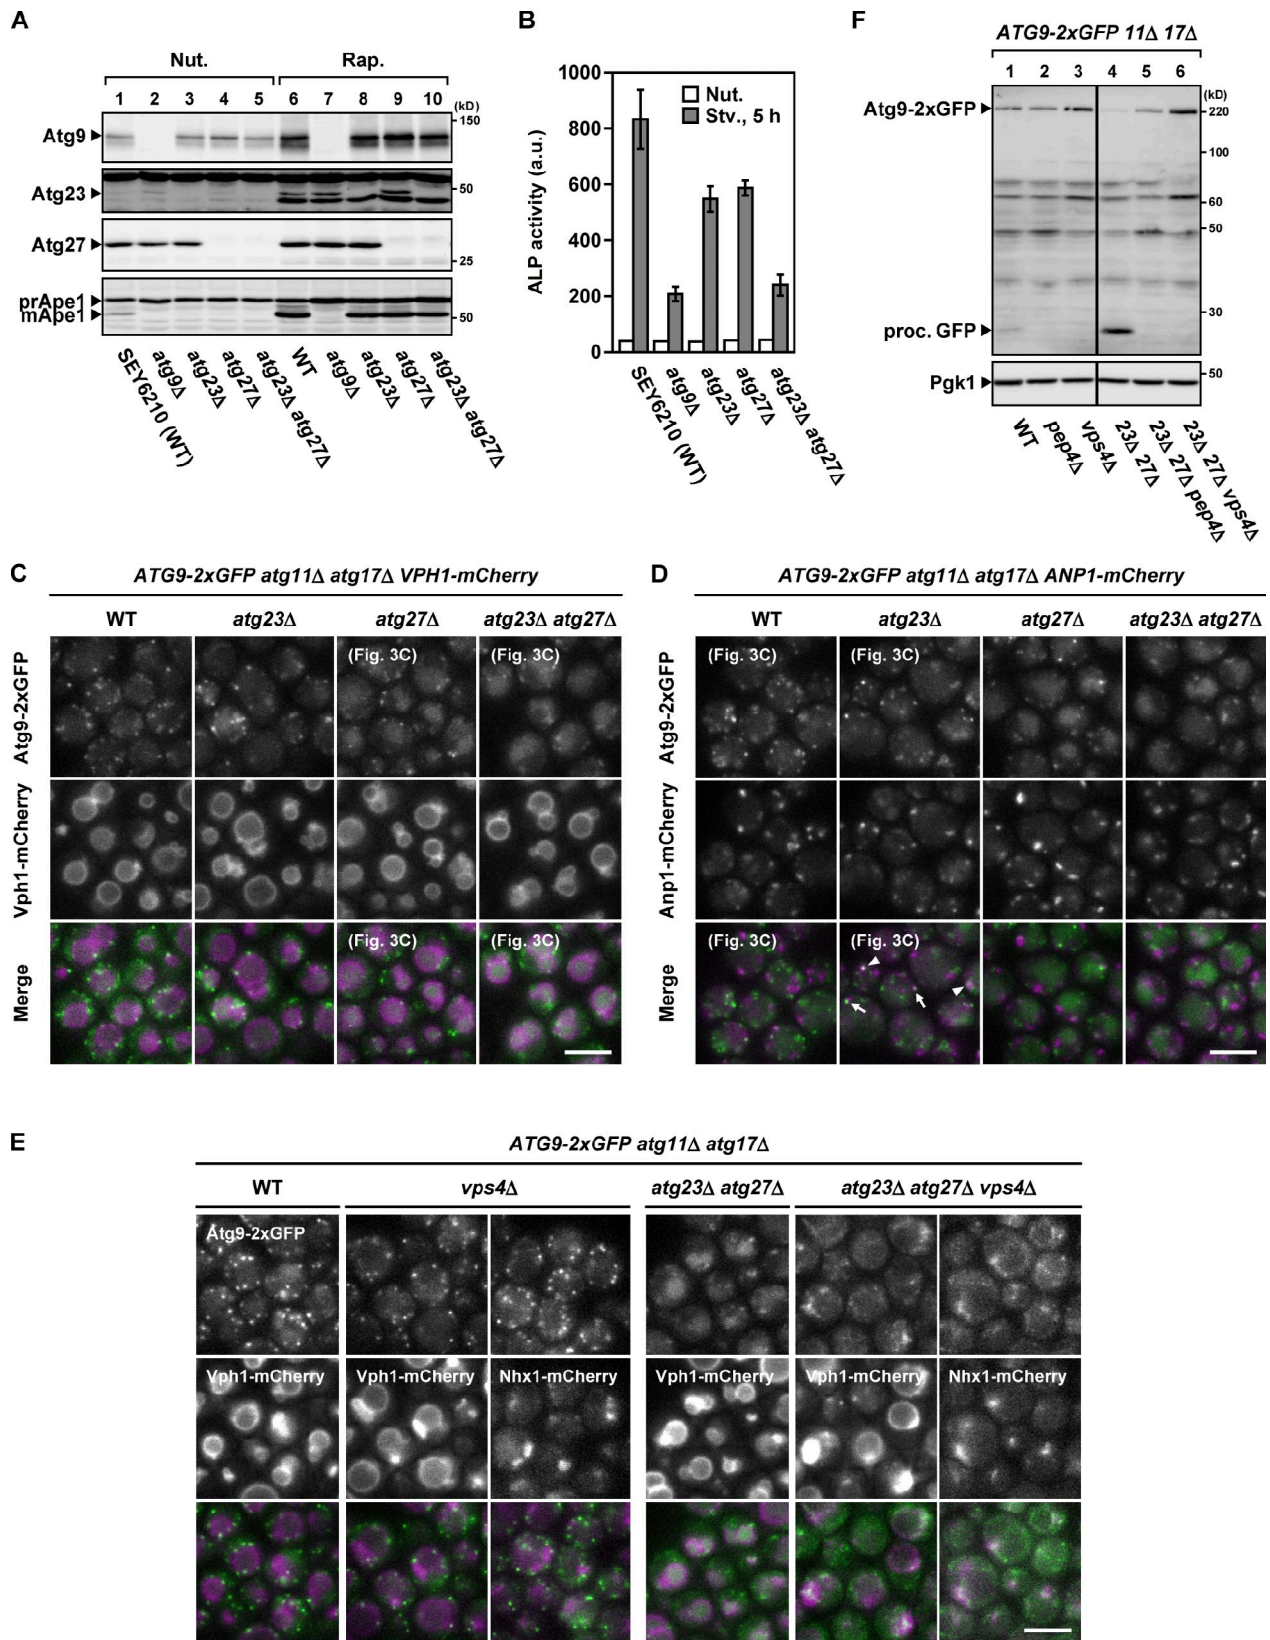

Figure S3. **Atg9 vesicles are derived from the Golgi apparatus in a process involving Atg23 and Atg27.** (A) SEY6210 wild-type cells, *atg9Δ* cells, *atg23Δ* cells, *atg27Δ* cells, and *atg23Δ atg27Δ* cells were grown in SD/CA medium (nutrient [Nut.]) and then treated with rapamycin for 2 h (Rap.). Total cell lysates were prepared from the cells and then subjected to immunoblotting. (B) Autophagic activities of the cells used in A were measured by ALP assay using pTN3 (Noda et al., 1995). Error bars indicate standard deviation. Stv., starved. (C and D) Additional data associated with Fig. 3 C. *ATG9-2xGFP atg11Δ atg17Δ* cells lacking Atg23 and/or Atg27 were treated with rapamycin for 3 h. Several images are also used in Fig. 3 C. Vph1-mCherry (vacuole) and Anp1-mCherry (Golgi) were used as organelle markers. Green fluorescence and red fluorescence were acquired concurrently. Arrowheads and arrows indicate Atg9-GFP clusters accumulated at and adjacent to the Golgi apparatus, respectively. (E) *ATG9-2xGFP atg11Δ atg17Δ* cells lacking Atg23, Atg27, and/or Vps4 were treated with rapamycin for 3 h. Vph1-mCherry (vacuole) and Nhx1-mCherry (endosome) were used as organelle markers. (F) *ATG9-2xGFP atg11Δ atg17Δ* cells lacking Pep4 or Vps4 and *ATG9-2xGFP atg11Δ atg17Δ atg23Δ atg27Δ* cells lacking Pep4 or Vps4 were grown in SD/CA medium and then treated with rapamycin for 3 h. Total cell lysates were prepared from the cells and then subjected to immunoblotting. proc. GFP, the processed form of GFP moiety; WT, wild type. Bars, 5 μm.

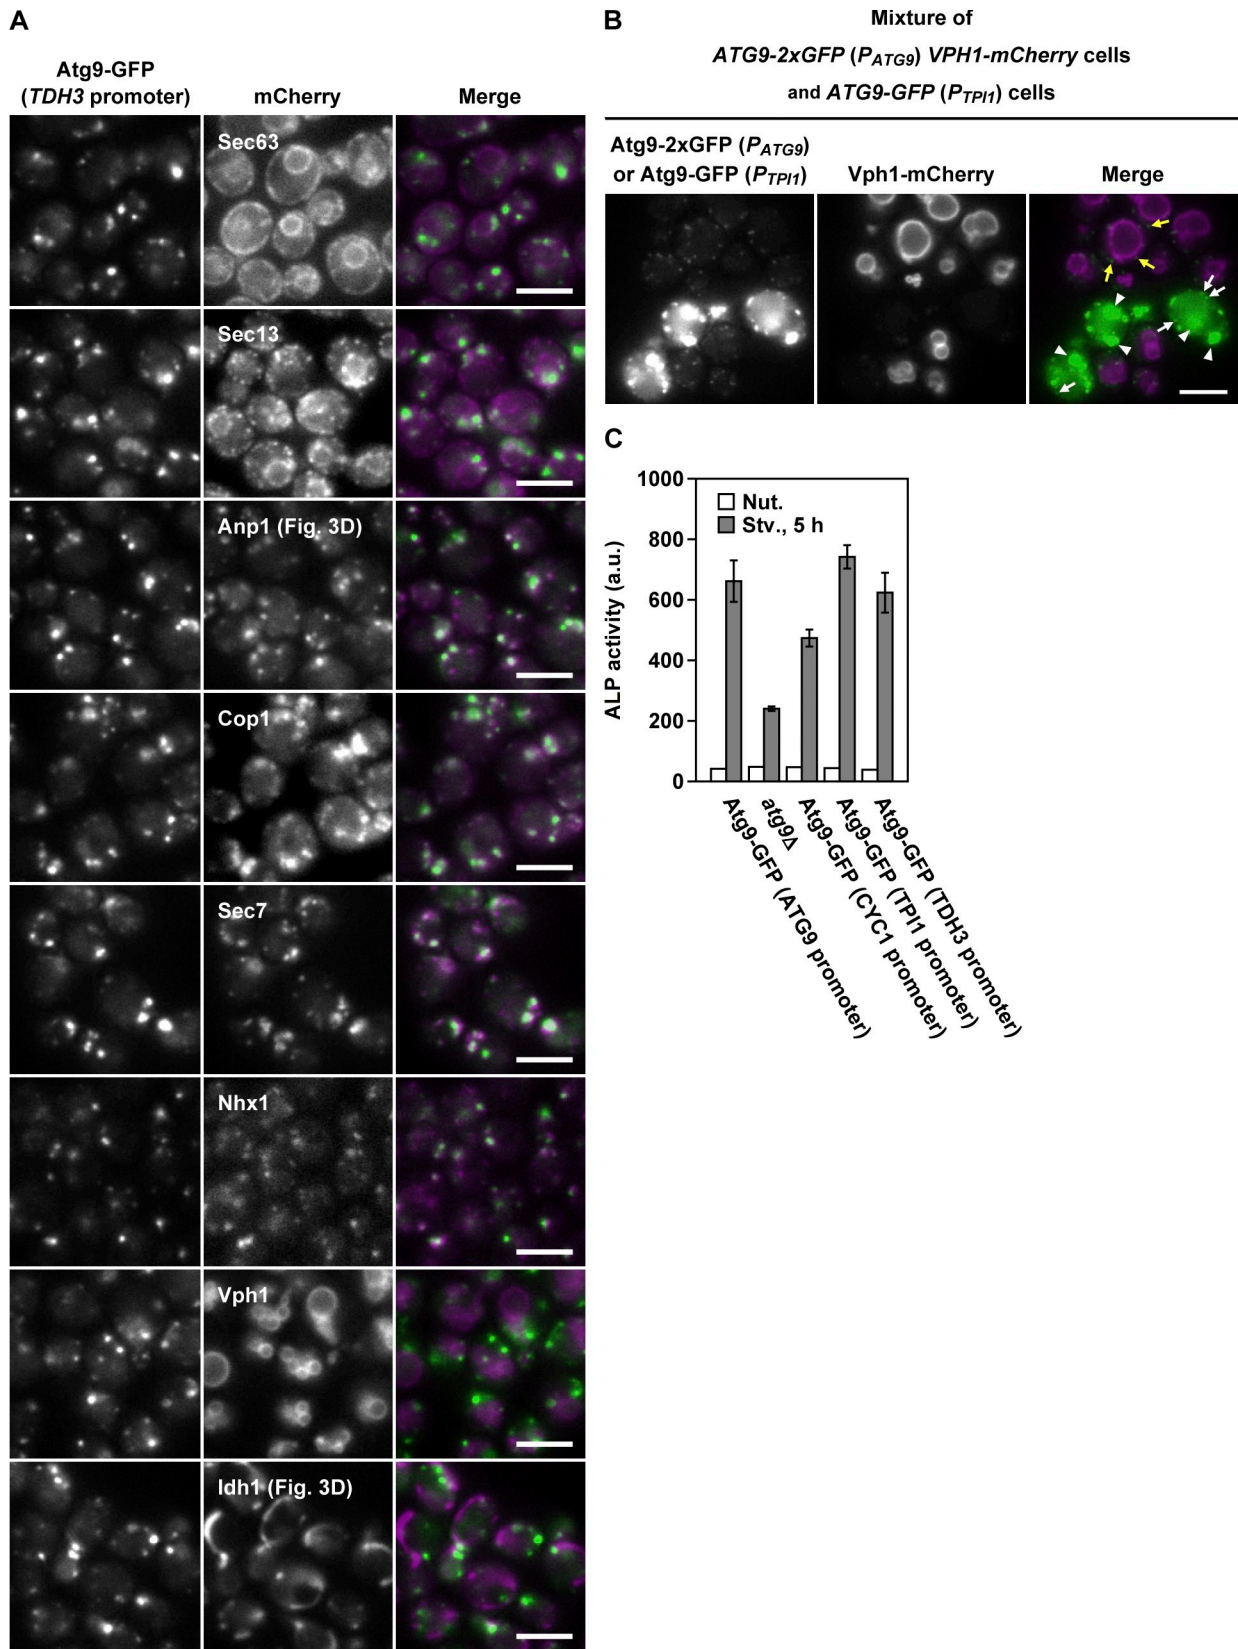

Figure S4. **Overexpressed Atg9 aberrantly accumulates at the Golgi apparatus.** (A) Cells expressing Atg9-GFP via the *TDH3* promoter were observed at 32 ms/frame. Sec63-mCherry (ER), Sec13-mCherry (ER exit site), Anp1-mCherry (Golgi), Cop1-mCherry (Golgi), Sec7-mCherry (trans-Golgi network), Nhx1-mCherry (endosome), Vph1-mCherry (vacuole), and Idh1-mCherry (mitochondria) were used as organelle markers. Anp1-mCherry and Idh1-mCherry are also shown in Fig. 3 D. (B) Cells labeled with Vph1-mCherry expressing Atg9-2xGFP under control of the *ATG9* promoter were mixed with cells expressing Atg9-GFP under control of the *TP11* promoter and treated with rapamycin for 2 h. Yellow arrows, mobile Atg9 vesicles in cells expressing Atg9-2xGFP under control of the *ATG9* promoter; white arrows, mobile Atg9 vesicles in cells expressing Atg9-GFP under control of the *TP11* promoter. White arrowheads indicate immobile Atg9-GFP clusters accumulated at the Golgi apparatus in cells expressing Atg9-GFP under control of the *TP11* promoter. (C) Autophagic activities of the cells used in B were measured by ALP assay using pTN3 (Noda et al., 1995). Error bars indicate standard deviation. (B and C) Even in cells overexpressing Atg9-GFP, a significant number of mobile Atg9 vesicles were still observed in addition to the immobile Atg9 clusters accumulated at the Golgi apparatus, which may explain why these cells exhibit normal autophagic activities. a.u., arbitrary unit; Nut., nutrient; Stv., starved. Bars, 5  $\mu$ m.

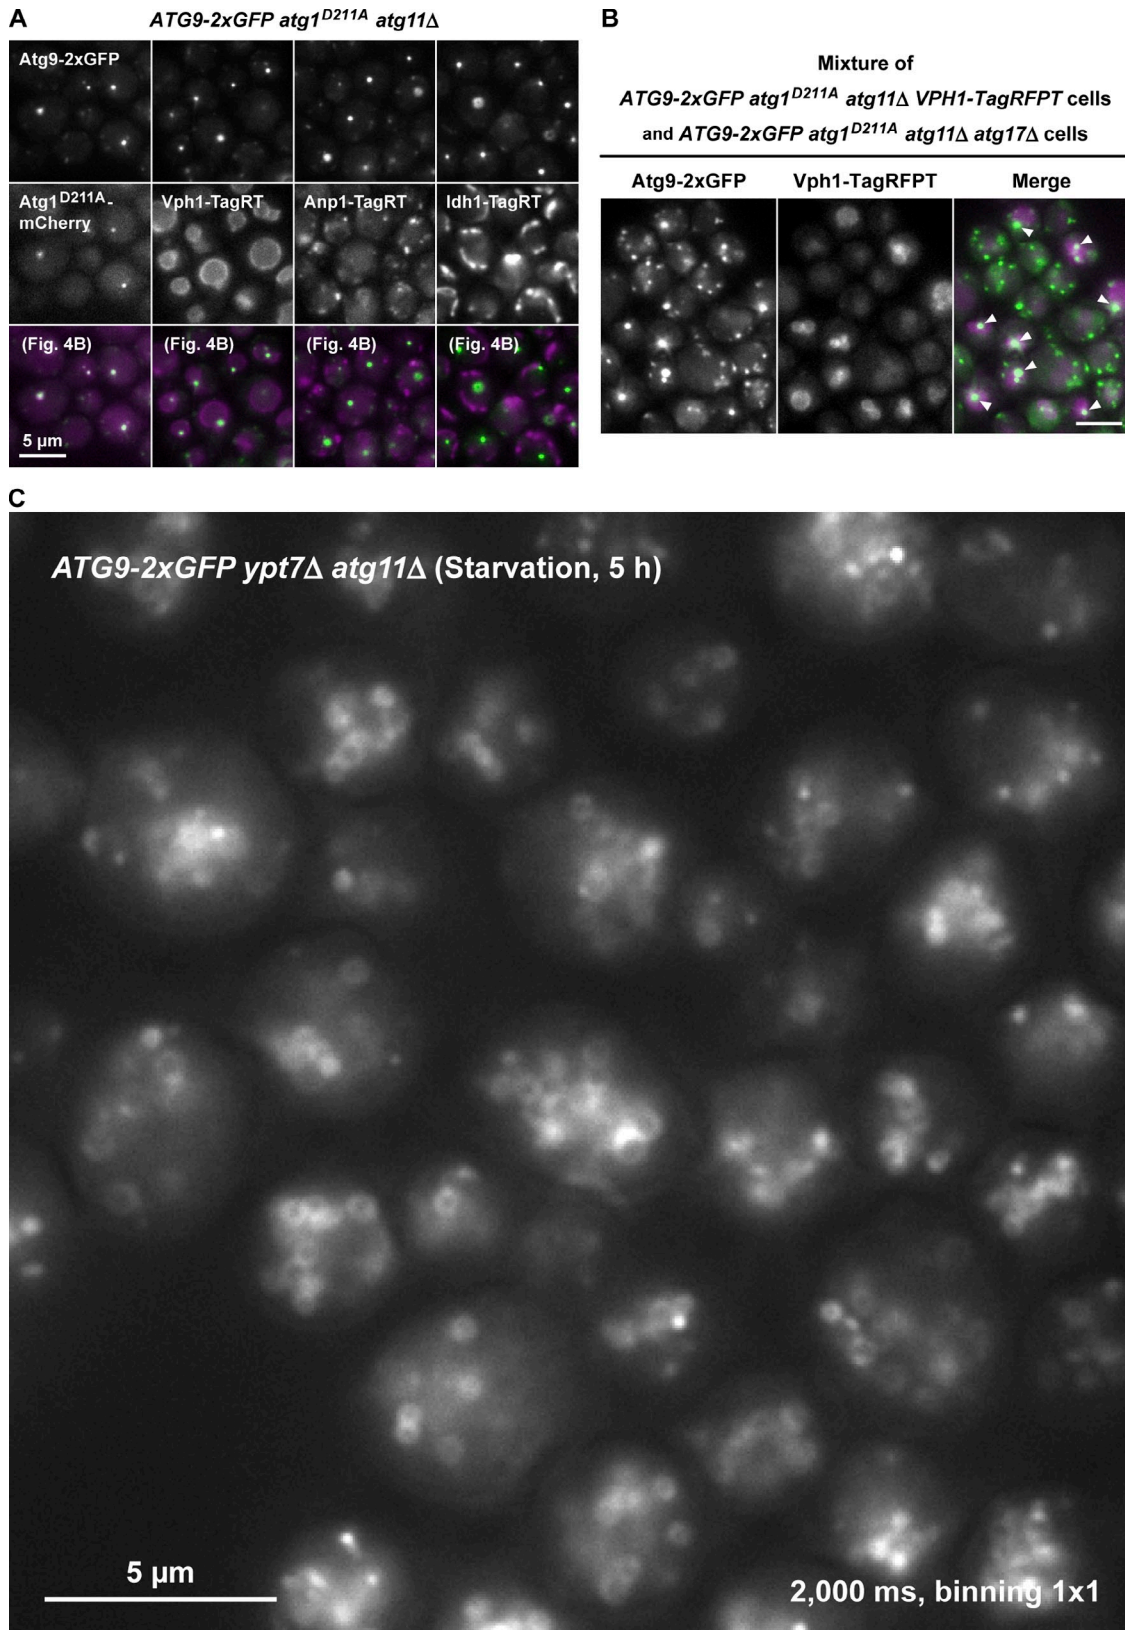

Figure S5. **Atg9 accumulates at the PAS in *atg1* kinase-dead cells and localizes around the autophagosome in *ypt7Δ* cells.** (A) Additional data associated with Fig. 4 B. *ATG9-2xGFP atg1<sup>D211A</sup> atg11Δ* cells were treated with rapamycin for 1 h. Several images are also used in Fig. 4 B. Atg1<sup>D211A</sup>-mCherry (PAS), Vph1-TagRFPT (vacuole), Anp1-TagRFPT (Golgi), and ldh1-TagRFPT (mitochondria) were used as organelle markers. (B) The cells used in Fig. 4 A (*ATG9-2xGFP atg1<sup>D211A</sup> atg11Δ VPH1-TagRFPT* cells and *ATG9-2xGFP atg1<sup>D211A</sup> atg11Δ atg17Δ* cells) were mixed and starved for 1 h. Arrowheads indicate *ATG9-2xGFP* vesicles that accumulated at the PAS in *atg1<sup>D211A</sup> atg11Δ* cells labeled with Vph1-TagRFPT. The vast majority of *ATG9-2xGFP* vesicles accumulated at the PAS; accordingly, the number of cytoplasmic mobile *ATG9-2xGFP* vesicles was significantly decreased (see also Video 7). Furthermore, in *atg11Δ atg17Δ* cells deficient for PAS formation, *ATG9-2xGFP* vesicles were still mobile even under starvation conditions (see also Video 7). Bar, 5 μm. (C) *ATG9-2xGFP ypt7Δ atg11Δ* cells were starved for 5 h in SD(-N) medium to cause autophagosomes to accumulate and then shifted to nutrient-rich SD/CA medium and incubated for 15 min. Cells were observed by fluorescence microscopy at 2,000 ms/frame. The ring-shaped pattern of *ATG9-2xGFP* was observed in almost all cells.

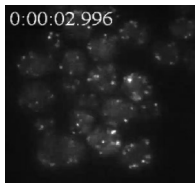

Video 1. **Atg9 vesicles were highly mobile in the cytoplasm.** *ATG9-2xGFP atg11Δ atg17Δ* cells were treated with rapamycin for 3 h. Images were analyzed by time-lapse microscopy at 20 ms/frame using an inverted microscope (IX71). The numbers at the top left indicate seconds and milliseconds.

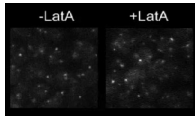

Video 2. **The motion of Atg9 vesicles was not altered after the treatment with latrunculin A.** *ATG9-2xGFP ABP140-mCherry* cells were treated with 100 μg/ml latrunculin A (LatA) for 20 min. Images were analyzed by time-lapse microscopy at 32 ms/frame using an inverted microscope (IX71).

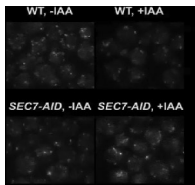

Video 3. **Accumulation of Atg9 at the Golgi apparatus in cells depleted of Sec7.** Video associated with Fig. S2 A. *ATG9-2xGFP DRS2-TagRFPT* cells and *ATG9-2xGFP DRS2-TagRFPT SEC7-AID* cells were treated with rapamycin for 30 min and then with 500 μg/ml IAA for 1 h. Images were analyzed by time-lapse microscopy at 32 ms/frame using an inverted microscope (IX71). In *ATG9-2xGFP DRS2-TagRFPT SEC7-AID* cells treated with IAA, Atg9-2xGFP formed immobile structures. WT, wild type.

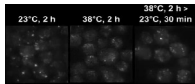

Video 4. **Accumulation of Atg9 at the Golgi apparatus in *sec7<sup>ts</sup>* cells.** Video associated with Fig. S2 C. *ATG9-2xGFP DRS2-TagRFPT sec7<sup>ts</sup>* cells grown at 23°C were shifted to 38°C and incubated for 2 h. Next, the cells were shifted to 23°C and incubated for 30 min. Images were analyzed by time-lapse microscopy at 32 ms/frame using an inverted microscope (IX71). At the nonpermissive temperature (38°C), Atg9-2xGFP formed immobile structures.

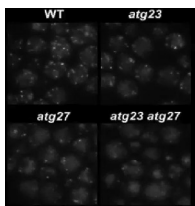

Video 5. **Mislocalization of Atg9 in *atg23Δ* or *atg27Δ* cells.** Video associated with Fig. 3 C. *ATG9-2xGFP atg11Δ atg17Δ* cells lacking Atg23 and/or Atg27 were treated with rapamycin for 3 h. Images were analyzed by time-lapse microscopy at 32 ms/frame using an inverted microscope (IX71). WT, wild type.

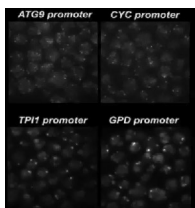

Video 6. **Aberrant accumulation of Atg9 in cells overexpressing Atg9.** Video associated with Fig. 3 E. Cells expressing Atg9-GFP via the *ATG9* promoter, *CYC1* promoter, *TPI1* promoter, or *TDH3* promoter were analyzed by time-lapse microscopy at 32 ms/frame using an inverted microscope (IX71).

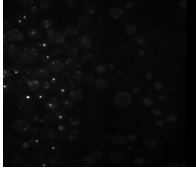

Video 7. **In response to starvation, cytoplasmic Atg9 vesicles assembled to the PAS.** Video associated with Fig. S5 B. *ATG9-2xGFP atg1<sup>D211A</sup> atg11Δ VPH1-TagRFPT* cells and *ATG9-2xGFP atg1<sup>D211A</sup> atg11Δ atg17Δ* cells were mixed and then treated with rapamycin for 2 h. Images were analyzed by time-lapse microscopy at 30 ms/frame using an inverted microscope (IX71). In *atg1<sup>D211A</sup> atg11Δ VPH1-TagRFPT* cells, Atg9-2xGFP vesicles accumulated at the PAS, and the number of cytoplasmic mobile Atg9 vesicles was decreased. Furthermore, no large clusters were observed in *atg1<sup>D211A</sup> atg11Δ atg17Δ* cells.

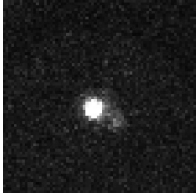

Video 8. **Atg9 vesicles assembled individually to the PAS.** Video associated with Fig. 4 C. *ATG9-2xGFP atg1<sup>D211A</sup>-mCherry atg11Δ* cells were treated with rapamycin for 1 h. Images were analyzed by time-lapse microscopy at 32 ms/frame using an inverted microscope (IX71).

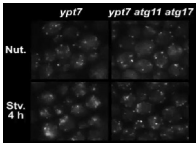

Video 9. **Atg9 localized onto the autophagosomal membranes.** Video associated with Fig. 4 D. *ATG9-2xGFP ypt7Δ* cells and *ATG9-2xGFP ypt7Δ atg11Δ atg17Δ* cells were starved for 4 h. Images were analyzed by time-lapse microscopy at 32 ms/frame using an inverted microscope (IX71). Nut., nutrient; Stv., starved.

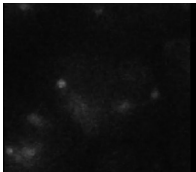

Video 10. **The intensity of Atg9-2xGFP clusters on the autophagosomal membrane was apparently comparable to that of the cytoplasmic mobile Atg9-2xGFP vesicles.** *ATG9-2xGFP ypt7Δ atg11Δ* cells used in Fig. 6 D were starved for 3 h in SD(-N) medium. Images were analyzed by time-lapse microscopy at 30 ms/frame using an inverted microscope (IX71). The intensities of clusters on the autophagosomal membrane were apparently comparable to those of the cytoplasmic mobile Atg9 vesicles.

Table S1. *S. cerevisiae* strains used in this study

| Strain    | Genotype                                                                                                                                                                                   | Source              |
|-----------|--------------------------------------------------------------------------------------------------------------------------------------------------------------------------------------------|---------------------|
| SEY6210   | <i>MAT<math>\alpha</math> ura3-52 his3-200 leu2-3,112 trp1-901 lys2-801 suc2-9</i>                                                                                                         | Darsow et al., 1997 |
| ScHY-188  | SEY6210, <i>ATG9-2xGFP::kanMX6 atg1(D211A)-mCherry::CgTRP1 atg1<math>\Delta</math>::CgHIS3</i>                                                                                             | This study          |
| ScHY-312  | SEY6210, <i>atg9<math>\Delta</math>::natNT2</i>                                                                                                                                            | This study          |
| ScHY-406  | SEY6210, <i>ypt7<math>\Delta</math>::natNT2</i>                                                                                                                                            | This study          |
| ScHY-409  | SEY6210, <i>ATG9-2xGFP::kanMX6 ypt7<math>\Delta</math>::natNT2 atg1<math>\Delta</math>::CgHIS3</i>                                                                                         | This study          |
| ScHY-428  | SEY6210, <i>ATG9-2xGFP::kanMX6 ypt7<math>\Delta</math>::natNT2 atg1<math>\Delta</math>::CgHIS3 atg17<math>\Delta</math>::hphNT1</i>                                                        | This study          |
| ScHY-478  | SEY6210, <i>ypt7<math>\Delta</math>::natNT2 pRS316[GFP-ATG8]</i>                                                                                                                           | This study          |
| ScHY-482  | SEY6210, <i>atg23<math>\Delta</math>::hphNT1</i>                                                                                                                                           | This study          |
| ScHY-518  | SEY6210, <i>ypt7<math>\Delta</math>::natNT2 atg1<math>\Delta</math>::hphNT1 atg1<math>\Delta</math>::CgHIS3</i>                                                                            | This study          |
| ScHY-573  | SEY6210, <i>atg27<math>\Delta</math>::hphNT1</i>                                                                                                                                           | This study          |
| ScHY-737  | SEY6210, <i>leu2<math>\Delta</math>::GFP-ATG8::hphNT1 ypt7<math>\Delta</math>::natNT2</i>                                                                                                  | This study          |
| ScHY-740  | SEY6210, <i>ATG9-6xHA::kanMX6 ypt7<math>\Delta</math>::natNT2</i>                                                                                                                          | This study          |
| ScHY-800  | SEY6210, <i>ypt7<math>\Delta</math>::natNT2 atg1<math>\Delta</math>::kanMX6</i>                                                                                                            | This study          |
| ScHY-858  | SEY6210, <i>ATG9-2xGFP::kanMX6</i>                                                                                                                                                         | This study          |
| ScHY-859  | SEY6210, <i>ATG9-2xGFP::kanMX6 atg1(D211A)::hphNT1</i>                                                                                                                                     | This study          |
| ScHY-882  | SEY6210, <i>ATG9-2xGFP::kanMX6 atg1<math>\Delta</math>::CgHIS3 atg17<math>\Delta</math>::hphNT1</i>                                                                                        | This study          |
| ScHY-917  | SEY6210, <i>ATG9-2xGFP::kanMX6 atg1<math>\Delta</math>::CgHIS3 atg17<math>\Delta</math>::hphNT1 atg23<math>\Delta</math>::natNT2</i>                                                       | This study          |
| ScHY-919  | SEY6210, <i>ATG9-2xGFP::kanMX6 atg1<math>\Delta</math>::CgHIS3 atg17<math>\Delta</math>::hphNT1 atg27<math>\Delta</math>::natNT2</i>                                                       | This study          |
| ScHY-966  | SEY6210, <i>ATG9-GFP::kanMX6</i>                                                                                                                                                           | This study          |
| ScHY-967  | SEY6210, <i>P<sub>TDH3</sub> (natNT2)-ATG9-GFP::kanMX6</i>                                                                                                                                 | This study          |
| ScHY-969  | SEY6210, <i>P<sub>CYC1</sub> (natNT2)-ATG9-GFP::kanMX6</i>                                                                                                                                 | This study          |
| ScHY-1081 | SEY6210, <i>ATG9-2xGFP::kanMX6 atg1<math>\Delta</math>::CgHIS3 ypt7<math>\Delta</math>::mCherry-ATG8::zeoNT3</i>                                                                           | This study          |
| ScHY-1086 | SEY6210, <i>ATG9-2xKaede::kanMX6</i>                                                                                                                                                       | This study          |
| ScHY-1087 | SEY6210, <i>ATG9-2xKaede::kanMX6 atg1<math>\Delta</math>::CgHIS3 atg17<math>\Delta</math>::hphNT1</i>                                                                                      | This study          |
| ScHY-1104 | SEY6210, <i>P<sub>TDH3</sub> (natNT2)-ATG9-GFP::kanMX6 SEC63-mCherry::hphNT1</i>                                                                                                           | This study          |
| ScHY-1105 | SEY6210, <i>P<sub>TDH3</sub> (natNT2)-ATG9-GFP::kanMX6 SEC13-mCherry::hphNT1</i>                                                                                                           | This study          |
| ScHY-1106 | SEY6210, <i>P<sub>TDH3</sub> (natNT2)-ATG9-GFP::kanMX6 COP1-mCherry::hphNT1</i>                                                                                                            | This study          |
| ScHY-1107 | SEY6210, <i>P<sub>TDH3</sub> (natNT2)-ATG9-GFP::kanMX6 ANP1-mCherry::hphNT1</i>                                                                                                            | This study          |
| ScHY-1108 | SEY6210, <i>P<sub>TDH3</sub> (natNT2)-ATG9-GFP::kanMX6 SEC7-mCherry::hphNT1</i>                                                                                                            | This study          |
| ScHY-1113 | SEY6210, <i>P<sub>TDH3</sub> (natNT2)-ATG9-GFP::kanMX6 IDH1-mCherry::hphNT1</i>                                                                                                            | This study          |
| ScHY-1114 | SEY6210, <i>P<sub>TDH3</sub> (natNT2)-ATG9-GFP::kanMX6 VPH1-mCherry::hphNT1</i>                                                                                                            | This study          |
| ScHY-1131 | SEY6210, <i>ATG9-2xGFP::kanMX6 atg1<math>\Delta</math>::CgHIS3 atg17<math>\Delta</math>::zeoNT3 ANP1-mCherry::hphNT1</i>                                                                   | This study          |
| ScHY-1132 | SEY6210, <i>ATG9-2xGFP::kanMX6 atg1<math>\Delta</math>::CgHIS3 atg17<math>\Delta</math>::zeoNT3 atg23<math>\Delta</math>::natNT2 ANP1-mCherry::hphNT1</i>                                  | This study          |
| ScHY-1133 | SEY6210, <i>ATG9-2xGFP::kanMX6 atg1<math>\Delta</math>::CgHIS3 atg17<math>\Delta</math>::zeoNT3 atg27<math>\Delta</math>::natNT2 ANP1-mCherry::hphNT1</i>                                  | This study          |
| ScHY-1142 | SEY6210, <i>ATG9-3xBAP::kanMX6 pep4<math>\Delta</math>::CgHIS3 leu2<math>\Delta</math>::BirA::hphNT1 pRS316[ATG9-6xFLAG]</i>                                                               | This study          |
| ScHY-1147 | SEY6210, <i>ATG9-2xGFP::kanMX6 VPH1-mCherry::hphNT1</i>                                                                                                                                    | This study          |
| ScHY-1148 | SEY6210, <i>ATG9-2xGFP::kanMX6 atg1<math>\Delta</math>::CgHIS3 atg17<math>\Delta</math>::zeoNT3 VPH1-mCherry::hphNT1</i>                                                                   | This study          |
| ScHY-1151 | SEY6210, <i>ATG9-2xGFP::kanMX6 atg1<math>\Delta</math>::CgHIS3 atg17<math>\Delta</math>::zeoNT3 atg23<math>\Delta</math>::natNT2 VPH1-mCherry::hphNT1</i>                                  | This study          |
| ScHY-1154 | SEY6210, <i>ATG9-2xGFP::kanMX6 atg1<math>\Delta</math>::CgHIS3 atg17<math>\Delta</math>::zeoNT3 atg27<math>\Delta</math>::natNT2 VPH1-mCherry::hphNT1</i>                                  | This study          |
| ScHY-1168 | SEY6210, <i>atg23<math>\Delta</math>::hphNT1 atg27<math>\Delta</math>::natNT2</i>                                                                                                          | This study          |
| ScHY-1169 | SEY6210, <i>ATG9-2xGFP::kanMX6 atg1<math>\Delta</math>::CgHIS3 atg17<math>\Delta</math>::zeoNT3 atg23<math>\Delta</math>::natNT2 atg27<math>\Delta</math>::hphNT1</i>                      | This study          |
| ScHY-1176 | SEY6210, <i>ATG9-2xGFP::kanMX6 atg1(D211A)::hphNT1 atg1<math>\Delta</math>::CgHIS3 VPH1-TagRFP::natNT2</i>                                                                                 | This study          |
| ScHY-1177 | SEY6210, <i>ATG9-2xGFP::kanMX6 atg1(D211A)::hphNT1 atg1<math>\Delta</math>::CgHIS3 atg17<math>\Delta</math>::natNT2</i>                                                                    | This study          |
| ScHY-1220 | SEY6210, <i>pep4<math>\Delta</math>::natNT2 pRS316[ATG9-6xFLAG]</i>                                                                                                                        | This study          |
| ScHY-1225 | SEY6210, <i>pep4<math>\Delta</math>::natNT2 atg1<math>\Delta</math>::CgHIS3 atg17<math>\Delta</math>::hphNT1 pRS316[ATG9]</i>                                                              | This study          |
| ScHY-1226 | SEY6210, <i>pep4<math>\Delta</math>::natNT2 atg1<math>\Delta</math>::CgHIS3 atg17<math>\Delta</math>::hphNT1 pRS316[ATG9-6xFLAG]</i>                                                       | This study          |
| ScHY-1247 | SEY6210, <i>CSE4-GFP::kanMX6</i>                                                                                                                                                           | This study          |
| ScHY-1260 | SEY6210, <i>ATG9-2xGFP::kanMX6 atg1<math>\Delta</math>::CgHIS3 atg17<math>\Delta</math>::zeoNT3 atg23<math>\Delta</math>::natNT2 atg27<math>\Delta</math>::CgTRP1 ANP1-mCherry::hphNT1</i> | This study          |
| ScHY-1277 | SEY6210, <i>ATG9-2xGFP::kanMX6 leu2<math>\Delta</math>::mRFP-APE1::LEU2</i>                                                                                                                | This study          |
| ScHY-1304 | SEY6210, <i>P<sub>PH1</sub> (hphNT1)-ATG9-GFP::kanMX6</i>                                                                                                                                  | This study          |
| ScHY-1309 | SEY6210, <i>ATG9-2xGFP::kanMX6 ATG17-2xmCherry::hphNT1</i>                                                                                                                                 | This study          |
| ScHY-1311 | SEY6210, <i>ATG9-2xGFP::kanMX6 atg1<math>\Delta</math>::CgHIS3 atg17<math>\Delta</math>::zeoNT3 IDH1-mCherry::hphNT1</i>                                                                   | This study          |
| ScHY-1338 | SEY6210, <i>P<sub>TDH3</sub> (natNT2)-ATG9-GFP::kanMX6 NHX1-mCherry::hphNT1</i>                                                                                                            | This study          |
| ScHY-1429 | SEY6210, <i>ATG9-2xGFP::kanMX6 pep4<math>\Delta</math>::natNT2 atg1<math>\Delta</math>::CgHIS3 atg17<math>\Delta</math>::hphNT1</i>                                                        | This study          |



Table S1. *S. cerevisiae* strains used in this study (Continued)

| Strain    | Genotype                                                                                                                          | Source     |
|-----------|-----------------------------------------------------------------------------------------------------------------------------------|------------|
| SchY-1660 | SEY6210, <i>leu2Δ::GFP-ATG8::hphNT1 atg11Δ::kanMX6 atg17Δ::zeoNT3 ypt7Δ::natNT2</i>                                               | This study |
| SchY-1925 | SEY6210, <i>ATG9-2xGFP::kanMX6 atg11Δ::CgHIS3 atg17Δ::zeoNT3 atg23Δ::natNT2 atg27Δ::CgTRP1 VPH1-mCherry::hphNT1</i>               | This study |
| SchY-1928 | SEY6210, <i>ANP1-GFP::kanMX6 pep4Δ::natNT2 atg11Δ::CgHIS3 atg17Δ::hphNT1</i>                                                      | This study |
| SchY-1933 | SEY6210, <i>atg8Δ::GFP-ATG8::hphNT1 leu2Δ::mRFP-APE1::LEU2</i>                                                                    | This study |
| SchY-1935 | SEY6210, <i>pep4Δ::natNT2 pRS316[ATG9]</i>                                                                                        | This study |
| SchY-1947 | SEY6210, <i>ATG9-2xGFP::kanMX6 atg11Δ::CgHIS3 atg17Δ::zeoNT3 vps4Δ::natNT2 VPH1-mCherry::hphNT1</i>                               | This study |
| SchY-1951 | SEY6210, <i>ATG9-2xGFP::kanMX6 atg11Δ::CgHIS3 atg17Δ::zeoNT3 atg23Δ::KIURA3 atg27Δ::CgTRP1 vps4Δ::natNT2 VPH1-mCherry::hphNT1</i> | This study |
| SchY-2019 | SEY6210, <i>ATG9-2xGFP::kanMX6 atg1(D211A)::hphNT1 atg11Δ::CgHIS3 ANP1-TagRFPT::natNT2</i>                                        | This study |
| SchY-2020 | SEY6210, <i>ATG9-2xGFP::kanMX6 atg1(D211A)::hphNT1 atg11Δ::CgHIS3 IDH1-TagRFPT::natNT2</i>                                        | This study |
| SchY-2062 | X2180, <i>sec7[ts] ATG9-2xGFP::natNT2 DRS2-TagRFPT::hphNT1</i>                                                                    | This study |
| SchY-2076 | W303-1A, <i>ATG9-2xGFP::kanMX6 P<sub>ADH</sub>-OsTIR1-9xMyc::URA3 ade2::ADE2 GRS2-TagRFPT::hphNT1</i>                             | This study |
| SchY-2077 | W303-1A, <i>ATG9-2xGFP::kanMX6 P<sub>ADH</sub>-OsTIR1-9xMyc::URA3 ade2::ADE2 SEC7-AID::natNT2 GRS2-TagRFPT::hphNT1</i>            | This study |
| SchY-2388 | SEY6210, <i>ATG9-2xGFP::kanMX6 atg11Δ::CgHIS3 atg17Δ::hphNT1 vps4Δ::natNT2</i>                                                    | This study |
| SchY-2389 | SEY6210, <i>ATG9-2xGFP::kanMX6 atg11Δ::CgHIS3 atg17Δ::zeoNT3 atg23Δ::KIURA3 atg27Δ::hphNT1 vps4Δ::natNT2</i>                      | This study |
| SchY-2390 | SEY6210, <i>ATG9-2xGFP::kanMX6 atg11Δ::CgHIS3 atg17Δ::zeoNT3 atg23Δ::KIURA3 atg27Δ::hphNT1 pep4Δ::natNT2</i>                      | This study |
| SchY-2393 | SEY6210, <i>ATG9-2xGFP::kanMX6 atg11Δ::CgHIS3 atg17Δ::zeoNT3 NHX1-mCherry::hphNT1</i>                                             | This study |
| SchY-2394 | SEY6210, <i>ATG9-2xGFP::kanMX6 atg11Δ::CgHIS3 atg17Δ::zeoNT3 vps4Δ::natNT2 NHX1-mCherry::hphNT1</i>                               | This study |
| SchY-2395 | SEY6210, <i>ATG9-2xGFP::kanMX6 atg11Δ::CgHIS3 atg17Δ::zeoNT3 atg23Δ::KIURA3 atg27Δ::CgTRP1 vps4Δ::natNT2 NHX1-mCherry::hphNT1</i> | This study |
| SchY-2412 | SEY6210, <i>ATG9-2xGFP::kanMX6 atg11Δ::CgHIS3 atg17Δ::zeoNT3 ABP140-mCherry::hphNT1</i>                                           | This study |

## References

- Darsow, T., S.E. Rieder, and S.D. Emr. 1997. A multispecificity syntaxin homologue, Vam3p, essential for autophagic and biosynthetic protein transport to the vacuole. *J. Cell Biol.* 138:517–529. <http://dx.doi.org/10.1083/jcb.138.3.517>
- Franzusoff, A., and R. Schekman. 1989. Functional compartments of the yeast Golgi apparatus are defined by the *sec7* mutation. *EMBO J.* 8:2695–2702.
- Mari, M., J. Griffith, E. Rieter, L. Krishnappa, D.J. Klionsky, and F. Reggiori. 2010. An Atg9-containing compartment that functions in the early steps of autophagosome biogenesis. *J. Cell Biol.* 190:1005–1022. <http://dx.doi.org/10.1083/jcb.200912089>
- Nishimura, K., T. Fukagawa, H. Takisawa, T. Kakimoto, and M. Kanemaki. 2009. An auxin-based degron system for the rapid depletion of proteins in nonplant cells. *Nat. Methods.* 6:917–922. <http://dx.doi.org/10.1038/nmeth.1401>
- Noda, T., A. Matsuura, Y. Wada, and Y. Ohsumi. 1995. Novel system for monitoring autophagy in the yeast *Saccharomyces cerevisiae*. *Biochem. Biophys. Res. Commun.* 210:126–132. <http://dx.doi.org/10.1006/bbrc.1995.1636>
- Novick, P., C. Field, and R. Schekman. 1980. Identification of 23 complementation groups required for post-translational events in the yeast secretory pathway. *Cell.* 21:205–215. [http://dx.doi.org/10.1016/0092-8674\(80\)90128-2](http://dx.doi.org/10.1016/0092-8674(80)90128-2)
- Ohashi, Y., and S. Munro. 2010. Membrane delivery to the yeast autophagosome from the Golgi-endosomal system. *Mol. Biol. Cell.* 21:3998–4008. <http://dx.doi.org/10.1091/mbc.E10-05-0457>
